# Supplementary material for: Response of Precipitation in Tianshan to Global Climate Change Based on the Berkeley Earth and ERA5 Reanalysis Products
Source: MDPI journal article supplement (doi:10.3390/rs14030519), 2022-01-21
Supplement: s1 [file s1]

**Table S1.** Location of 30 meteorological stations.

|     | Station        | Latitude (°N) | Longitude (°E) | Altitude (m) | Location  |
|-----|----------------|---------------|----------------|--------------|-----------|
| WTS | Kashgar        | 39.47         | 75.98          | 1289.4       | plains    |
|     | Akqi           | 40.93         | 78.45          | 1984.9       | mountains |
|     | Wuqia          | 39.72         | 75.25          | 2178.0       | mountains |
|     | Turgart        | 40.52         | 75.40          | 3507.0       | mountains |
|     | Bachu          | 39.80         | 78.57          | 1116.5       | plains    |
|     | Kalpin         | 40.50         | 79.05          | 1161.8       | plains    |
| CTS | Zhaosu         | 43.15         | 81.13          | 1851.0       | mountains |
|     | Baluntai       | 42.73         | 86.30          | 1739.0       | mountains |
|     | Byanbulak      | 43.03         | 84.15          | 2458.0       | mountains |
|     | Yining         | 43.95         | 81.33          | 662.50       | plains    |
|     | Yanqi          | 42.08         | 86.57          | 1055.3       | plains    |
|     | Aksu           | 41.17         | 80.23          | 1103.8       | plains    |
|     | Baicheng       | 41.78         | 81.90          | 1229.2       | plains    |
|     | Kuqa           | 41.72         | 82.97          | 1081.9       | plains    |
|     | Korla          | 41.75         | 86.13          | 931.50       | plains    |
|     | Alar           | 40.55         | 81.27          | 1012.2       | plains    |
|     | Wusu           | 44.43         | 84.67          | 478.00       | plains    |
|     | Luntai         | 41.78         | 84.25          | 978.00       | plains    |
|     | Jinghe         | 44.62         | 82.90          | 320.10       | plains    |
| ETS | Barkol         | 43.60         | 93.05          | 1677.2       | mountains |
|     | Yiwu           | 43.27         | 94.70          | 1728.6       | mountains |
|     | Urumqi         | 43.78         | 87.65          | 935.00       | plains    |
|     | Dabancheng     | 43.35         | 88.32          | 1103.5       | plains    |
|     | Shisanjianfang | 43.22         | 91.73          | 721.40       | plains    |
|     | Qitai          | 44.02         | 89.57          | 793.50       | plains    |
|     | Kumux          | 42.23         | 88.22          | 922.40       | plains    |
|     | Naomao Lake    | 43.77         | 95.13          | 479.00       | plains    |
|     | Turpan         | 42.93         | 89.20          | 37.000       | plains    |
|     | Caijiahu       | 44.20         | 87.53          | 441.00       | plains    |
|     | Hami           | 42.82         | 93.52          | 737.20       | plains    |

**Table S2.** Parameters of the downscaling models.

| Month | b0    | b1   | b2   | b3    | b4    | b5    |
|-------|-------|------|------|-------|-------|-------|
| 1     | 0.23  | 0.40 | 0.01 | 0.01  | -1.32 | -0.87 |
| 2     | 0.23  | 0.64 | 0.03 | 0.01  | -1.59 | 0.11  |
| 3     | 0.18  | 0.64 | 0.06 | 0.01  | -1.52 | 0.12  |
| 4     | 0.03  | 0.53 | 0.07 | 0.01  | -0.26 | -0.81 |
| 5     | -0.04 | 0.59 | 0.09 | 0.01  | 0.11  | -0.75 |
| 6     | -0.17 | 0.92 | 0.15 | 0.01  | 0.54  | -0.90 |
| 7     | -0.19 | 0.75 | 0.15 | 0.01  | 0.86  | -0.79 |
| 8     | -0.15 | 0.68 | 0.15 | -0.01 | 0.91  | -0.67 |
| 9     | -0.08 | 0.54 | 0.11 | -0.01 | 0.35  | -0.24 |
| 10    | 0.02  | 0.45 | 0.05 | 0.01  | -0.39 | -0.17 |
| 11    | 0.14  | 0.50 | 0.02 | 0.02  | -0.99 | -0.95 |
| 12    | 0.24  | 0.37 | 0.01 | 0.01  | -1.53 | -0.85 |
| Month | b6    | b7   | b8   | b9    | b10   | b11   |
| 1     | -0.35 | 2.13 | 5.50 | -1.68 | -0.68 | -3.82 |
| 2     | -0.55 | 1.86 | 3.25 | -1.09 | -0.56 | -2.68 |
| 3     | -0.49 | 1.93 | 2.32 | -0.84 | -0.66 | 1.81  |
| 4     | -0.35 | 0.49 | 4.08 | -1.00 | -0.12 | -2.77 |

|    |       |       |      |       |       |       |
|----|-------|-------|------|-------|-------|-------|
| 5  | -0.36 | -0.16 | 3.71 | -0.90 | 0.20  | -2.56 |
| 6  | -0.50 | -0.81 | 4.24 | -0.87 | 0.51  | -3.03 |
| 7  | -0.32 | -1.48 | 3.34 | -0.58 | 0.85  | -2.36 |
| 8  | -0.17 | -1.83 | 2.98 | -0.43 | 1.03  | -2.19 |
| 9  | -0.22 | -0.93 | 1.89 | -0.32 | 0.55  | -1.47 |
| 10 | -0.32 | 0.50  | 2.20 | -0.62 | -0.15 | -1.60 |
| 11 | -0.45 | 1.76  | 5.62 | -1.68 | -0.56 | -3.77 |
| 12 | -0.31 | 2.66  | 5.43 | -1.76 | -0.99 | -3.66 |

Table note: The equations are expressed as:  $P = b_0 + b_1 \times A + b_2 \times B + b_3 \times C + b_4 \times D + b_5 \times E + b_6 \times A^2 + b_7 \times D^2 + b_8 \times E^2 + b_9 \times D \times E + b_{10} \times D^3 + b_{11} \times E^3$ . where,  $A$  is elevation,  $B$  is aspect,  $C$  is slope,  $D$  is longitude, and  $E$  is latitude.

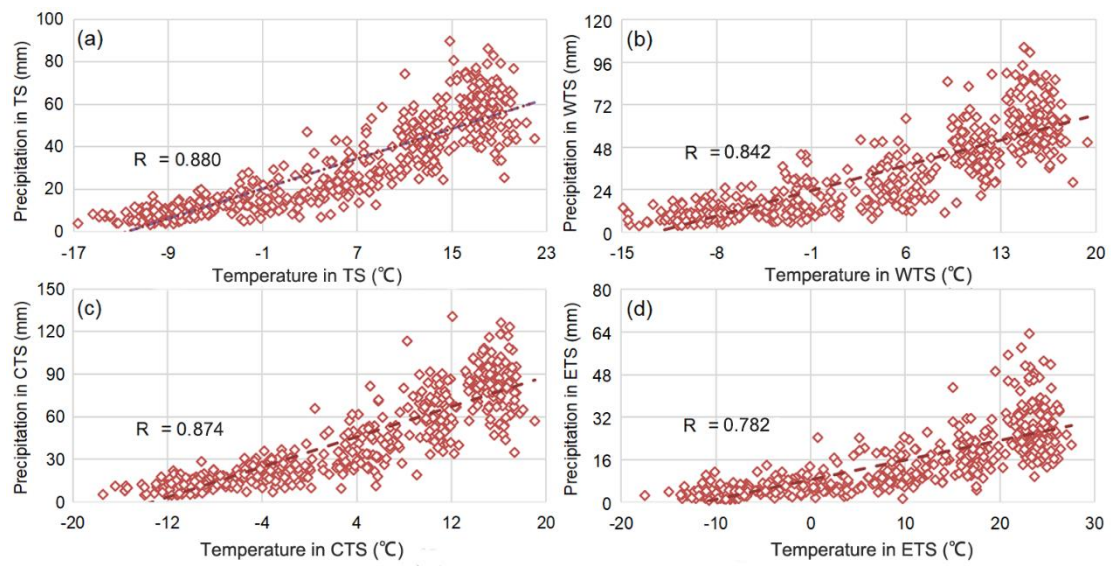

**Figure S1.** Scatter plots between monthly precipitation and local temperature: (a) Tianshan, (b) WTS, (c) CTS, and (d) ETS.

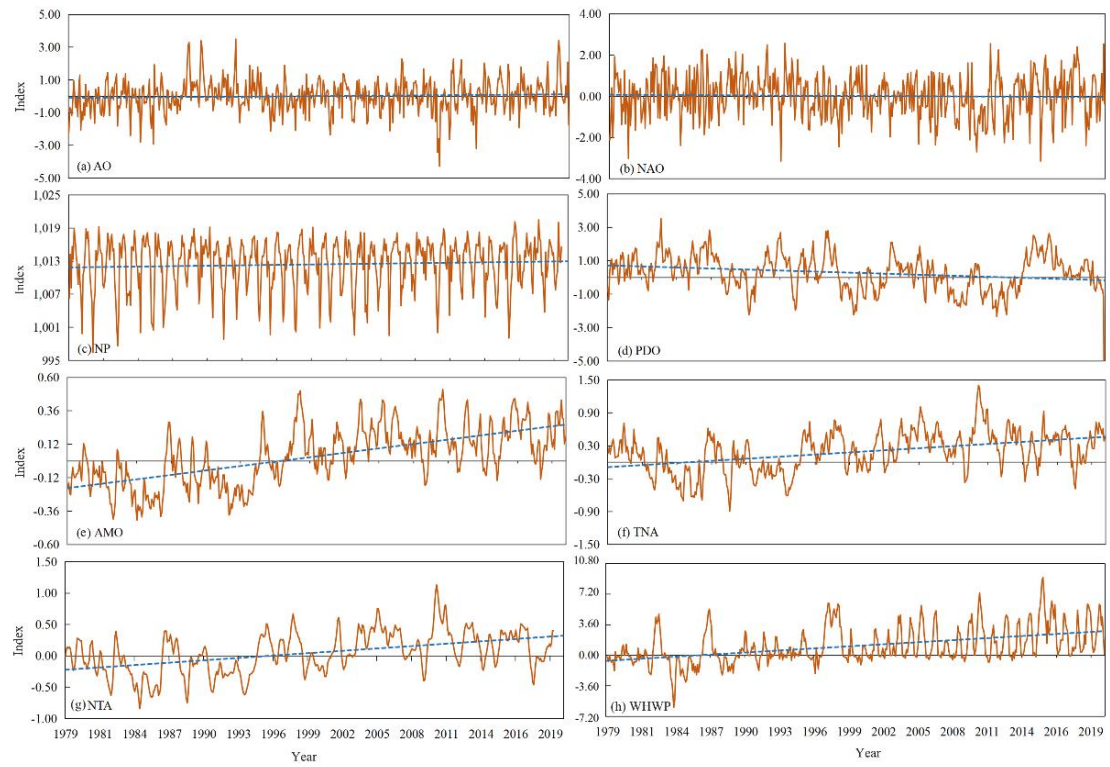

**Figure S2.** Changes in atmospheric circulation indexes: (a) AO, (b) NAO, (c) NP, (d) PDO, (e) AMO, (f) TNA, (g) NTA, and (h) WHWP.
